# Supplementary material
Source: HighWire-hosted journal article supplement (https://gut.bmj.com/content/70/1/92)

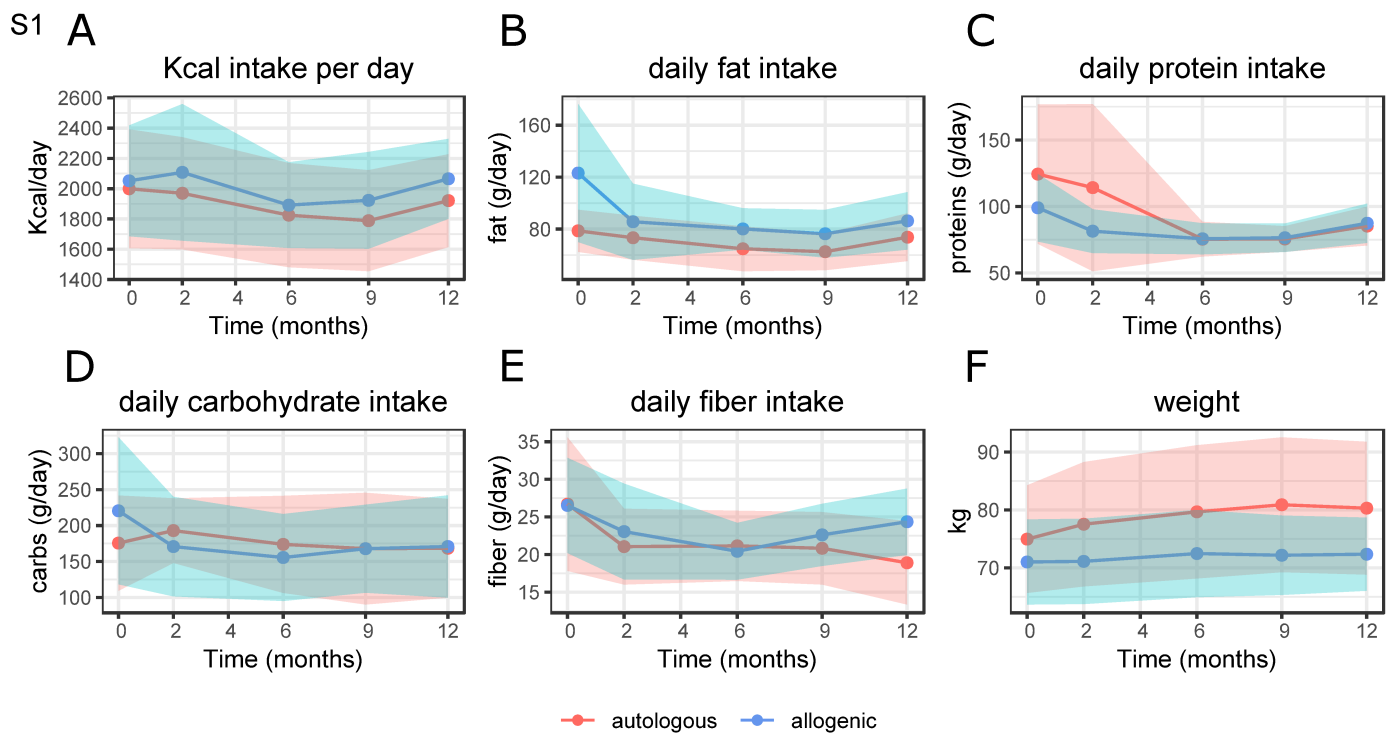

S2

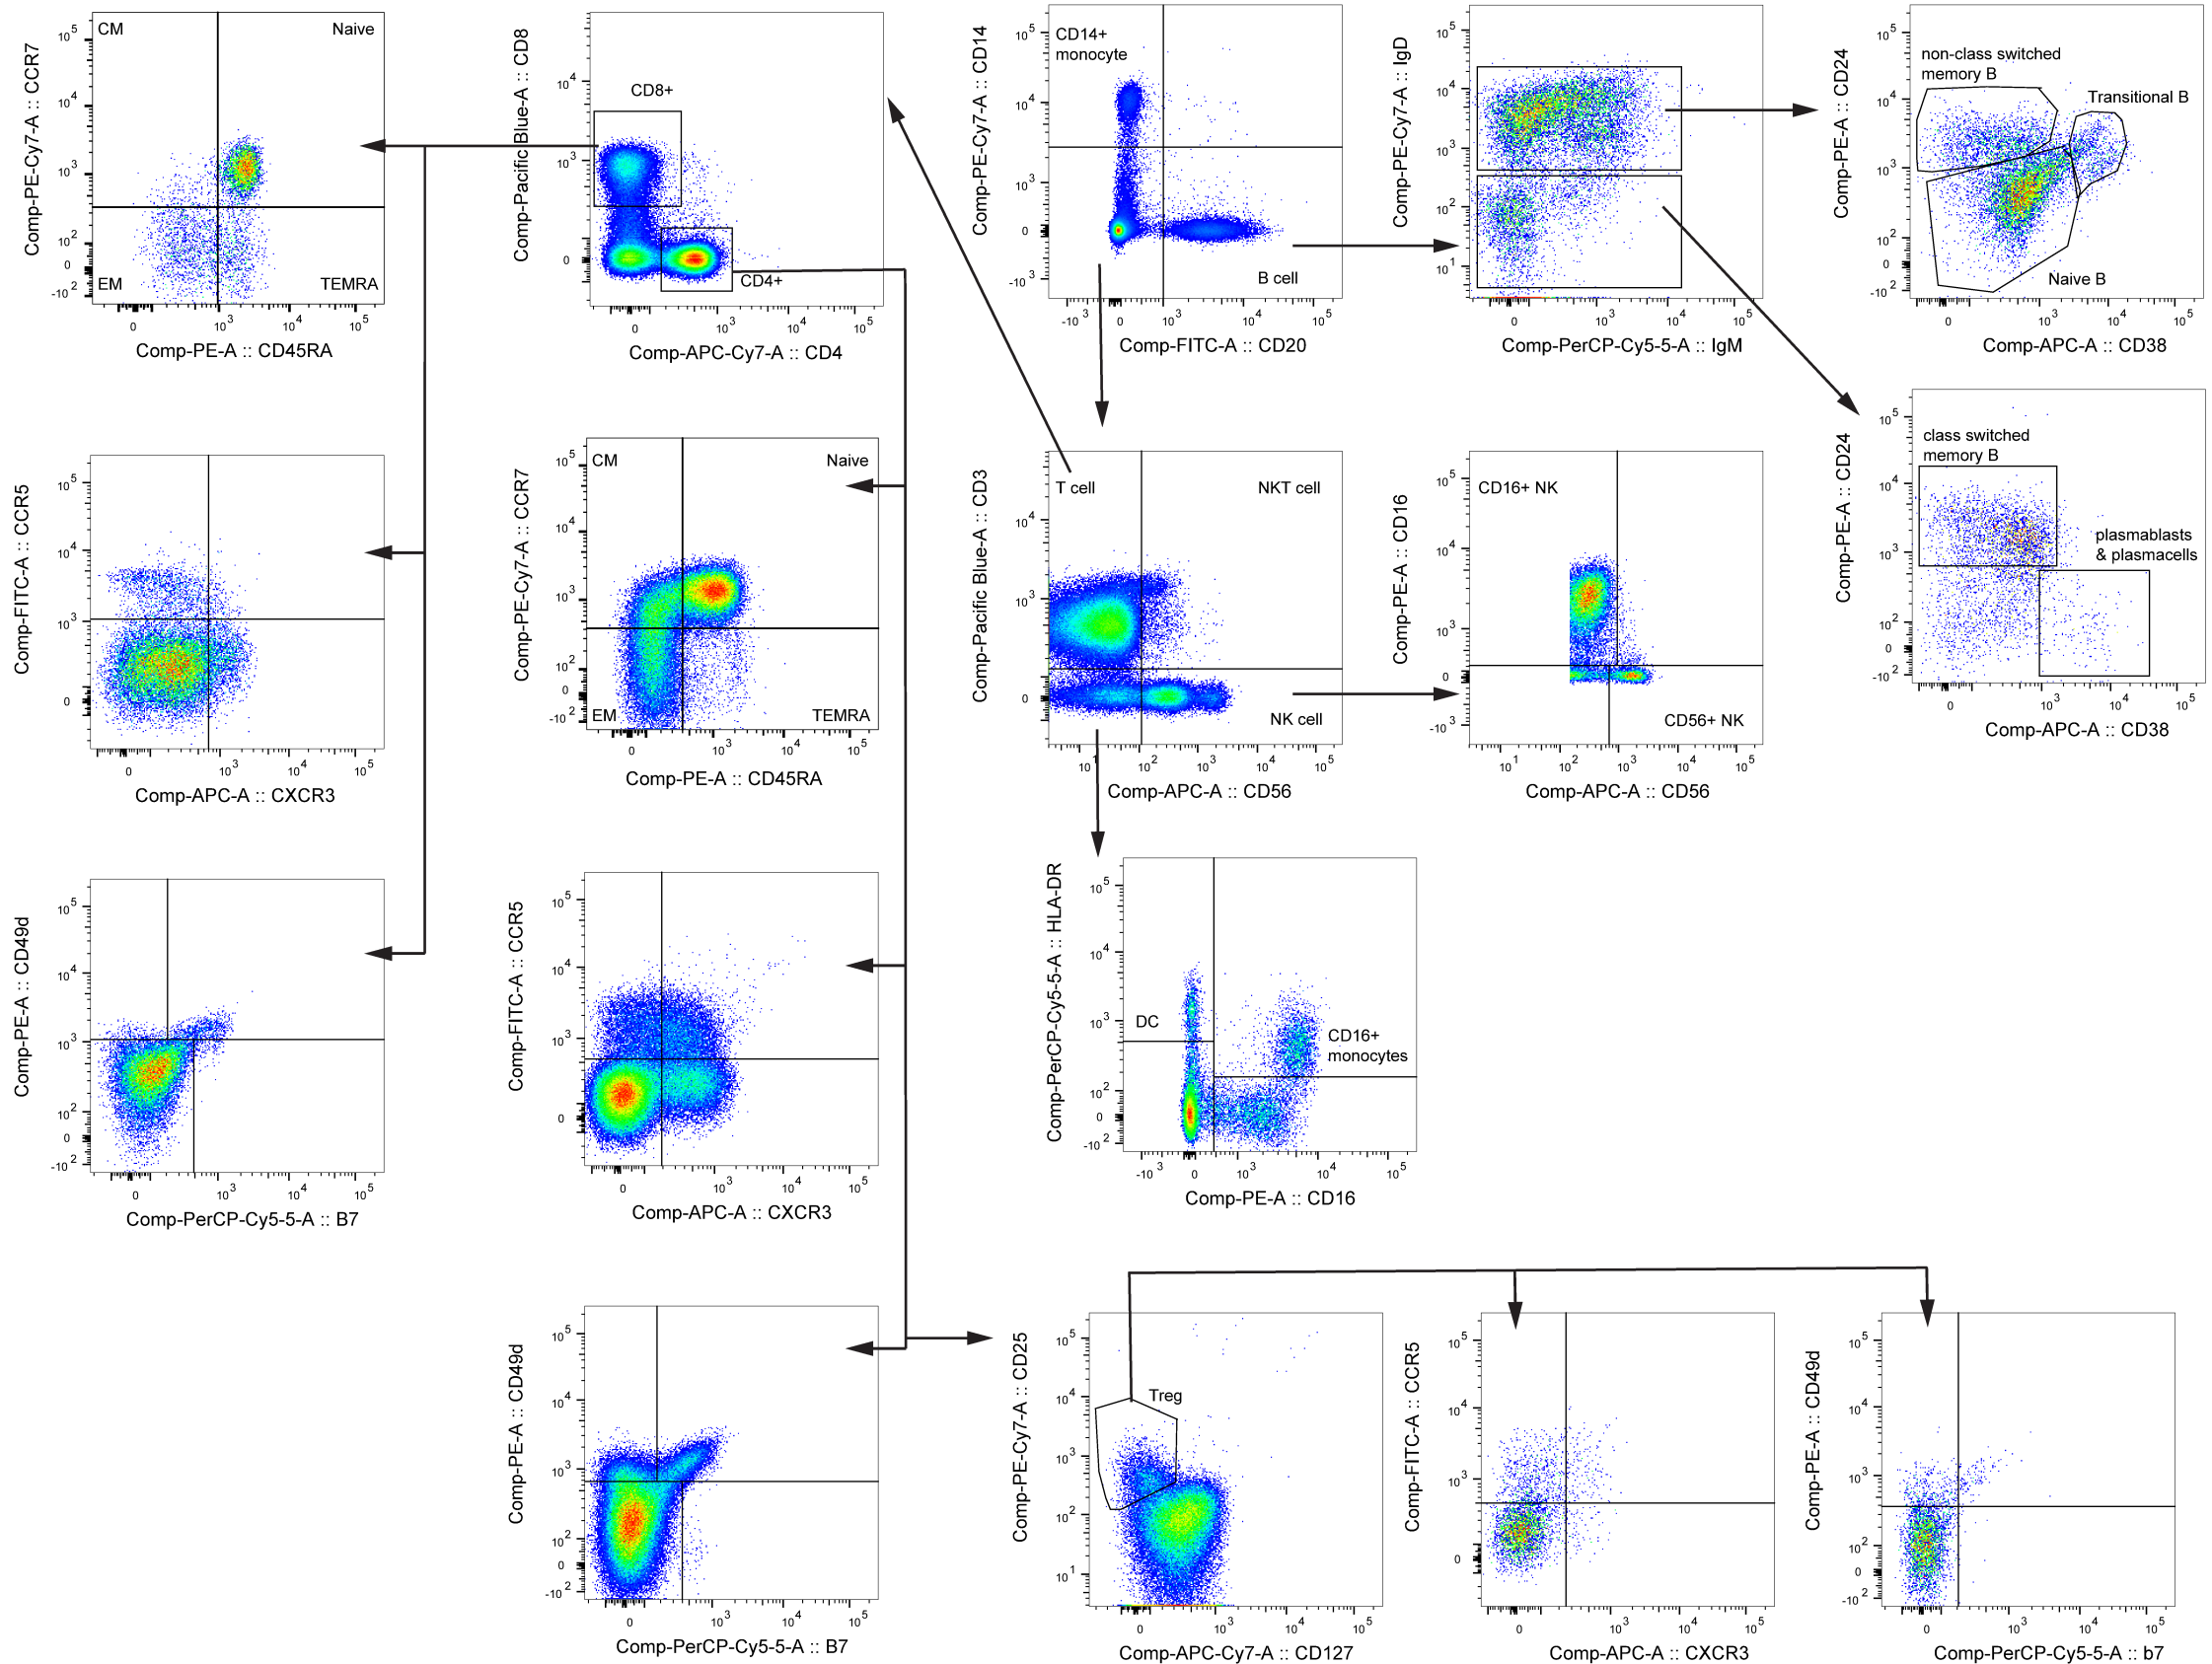

S3 A

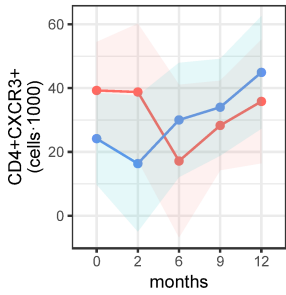

B

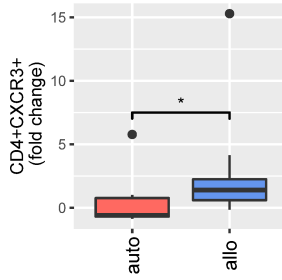

C

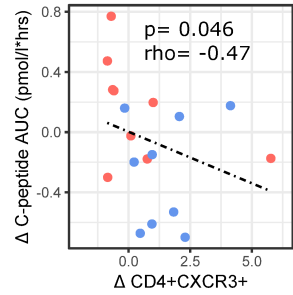

D

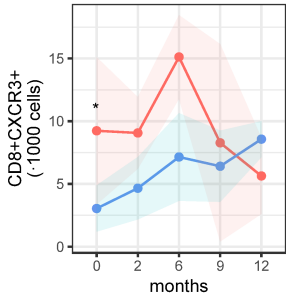

E

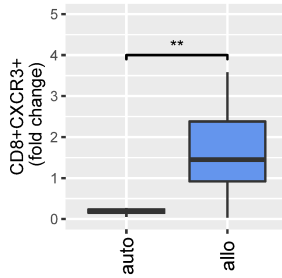

F

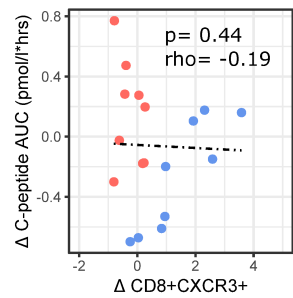

S4

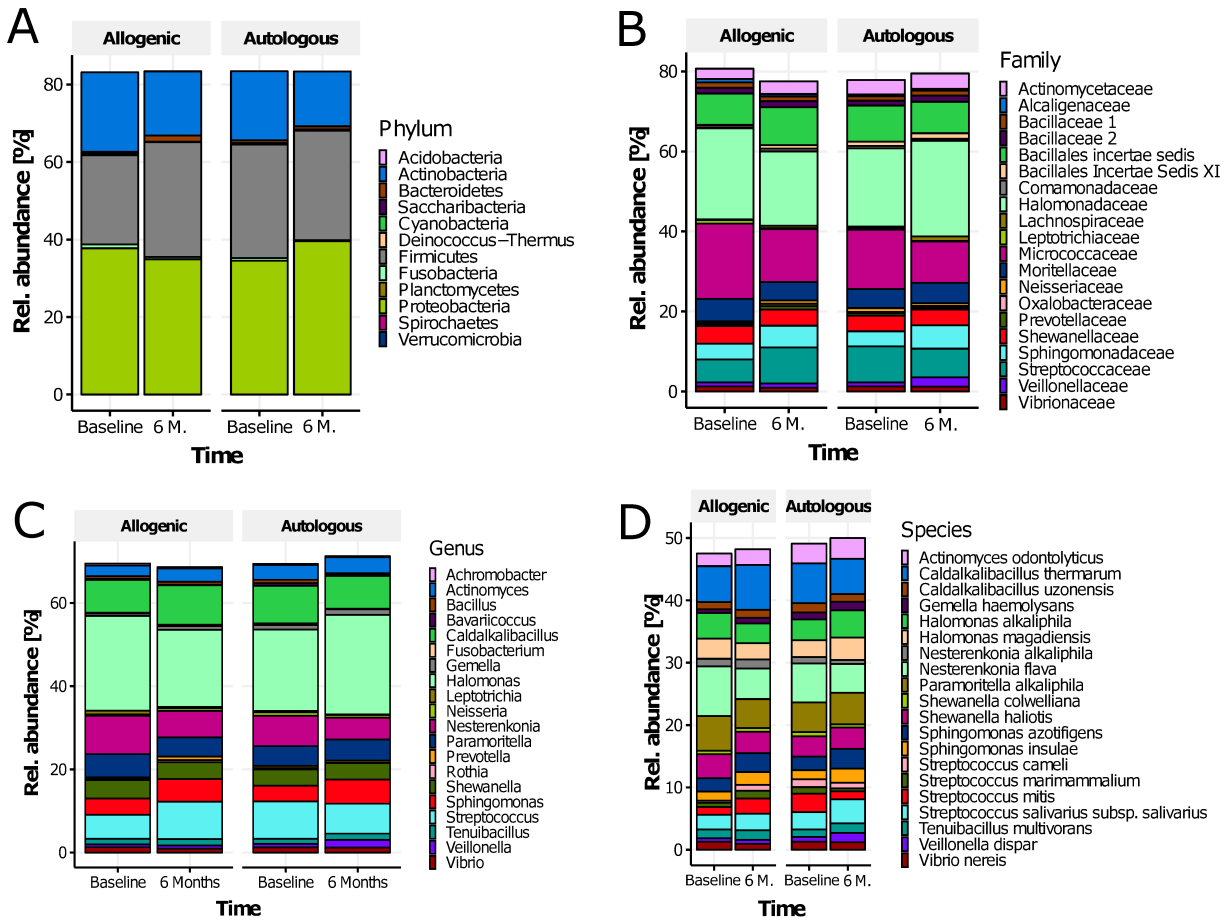

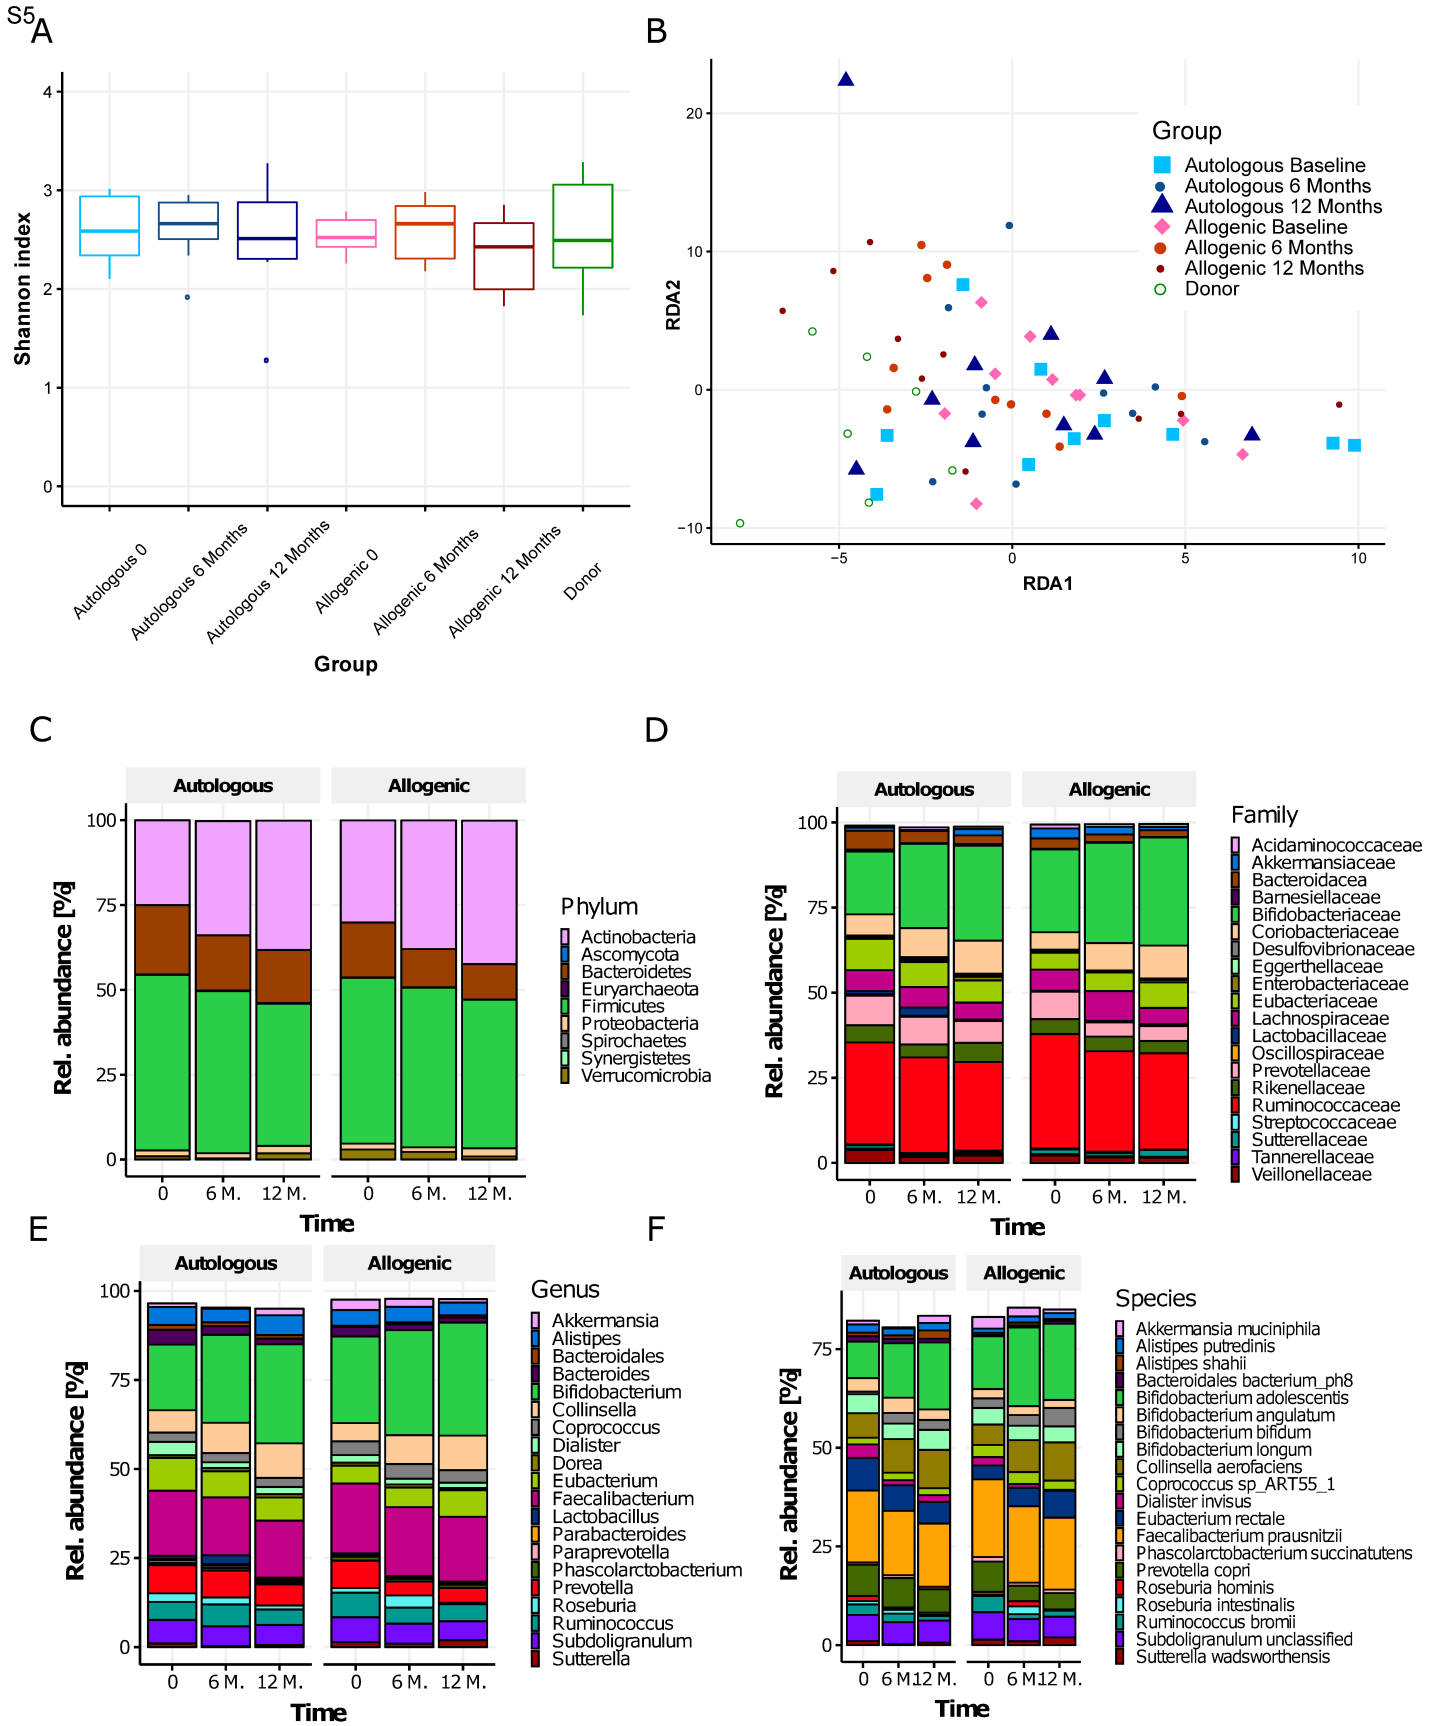

S6 A

Top 30 Relative Variable Importances

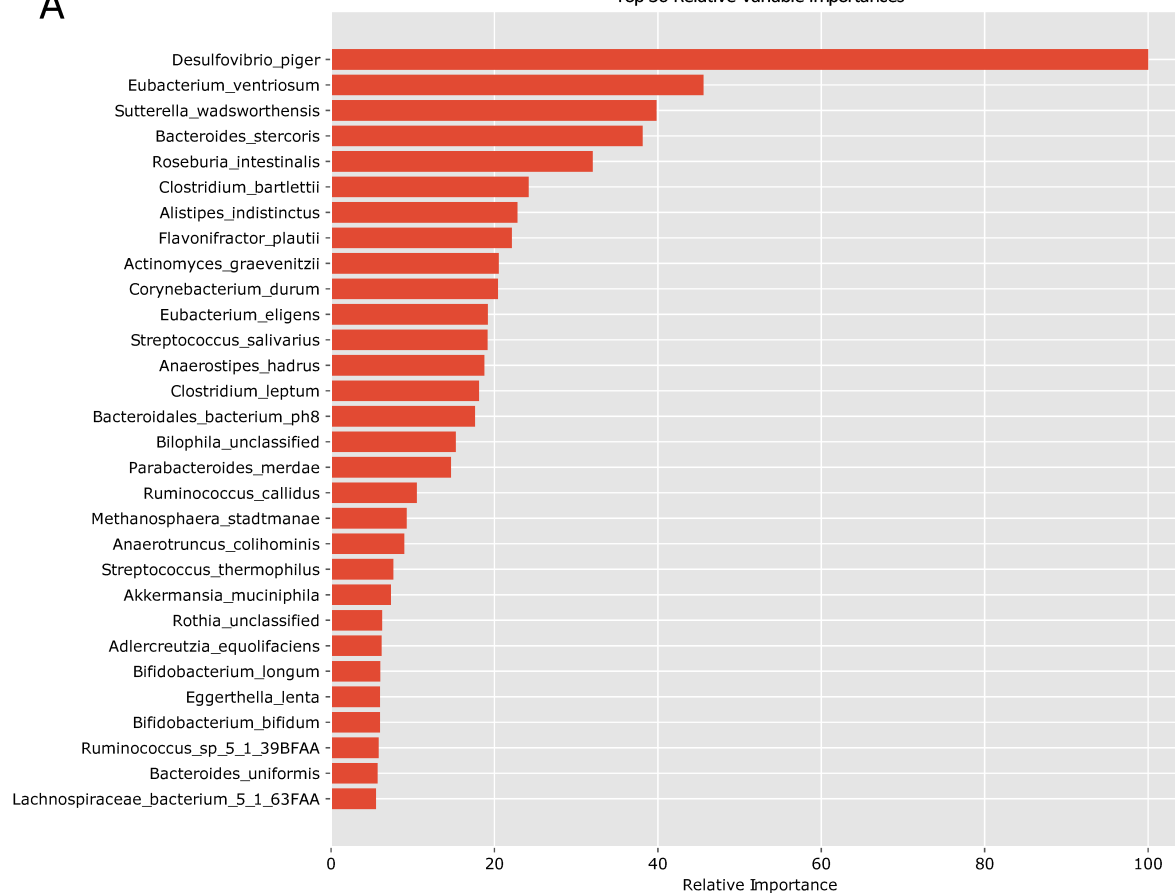

B

Top 30 Relative Variable Importances

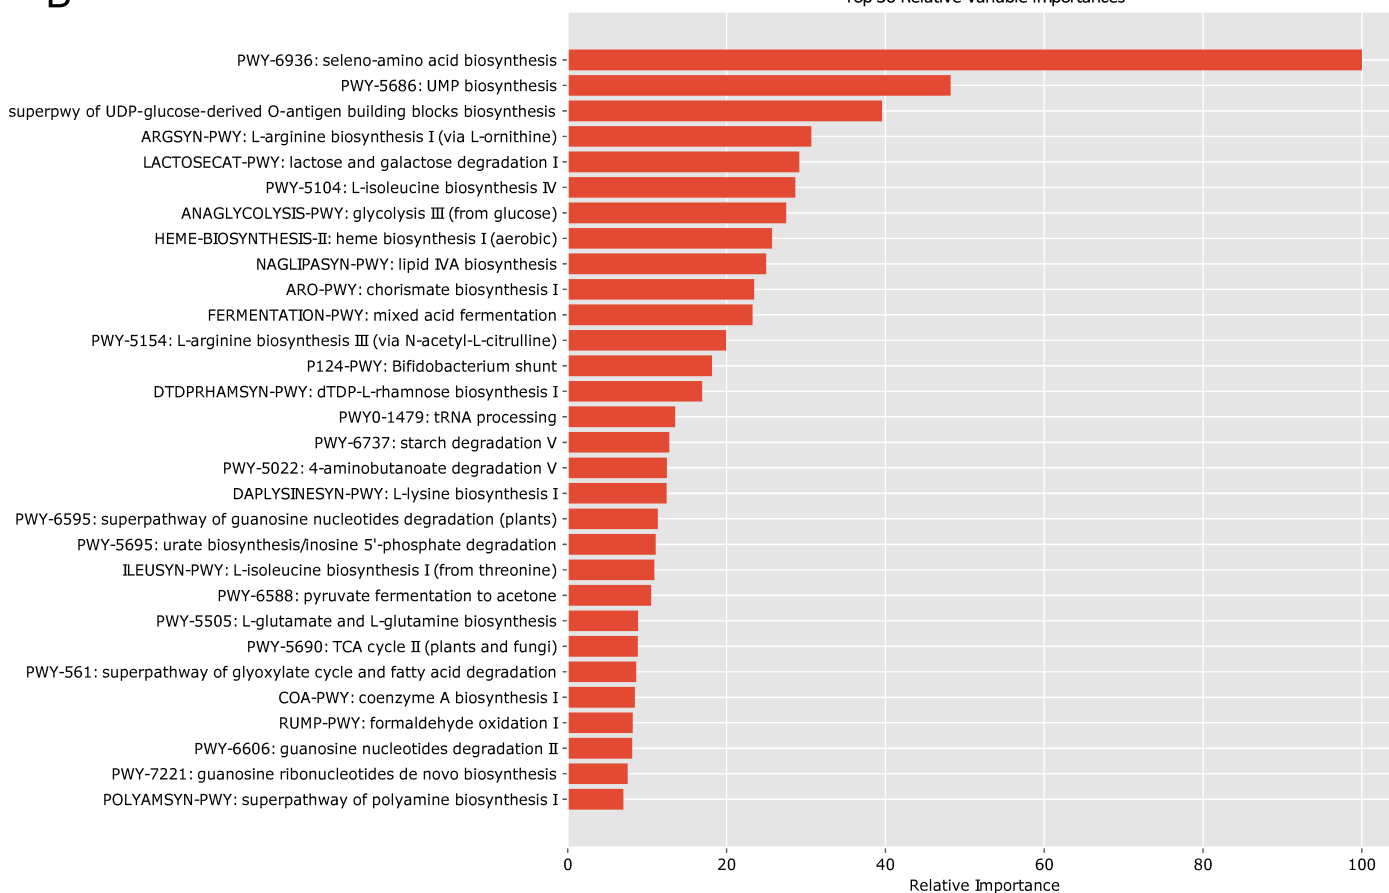

S7

Top 30 Relative Variable Importances

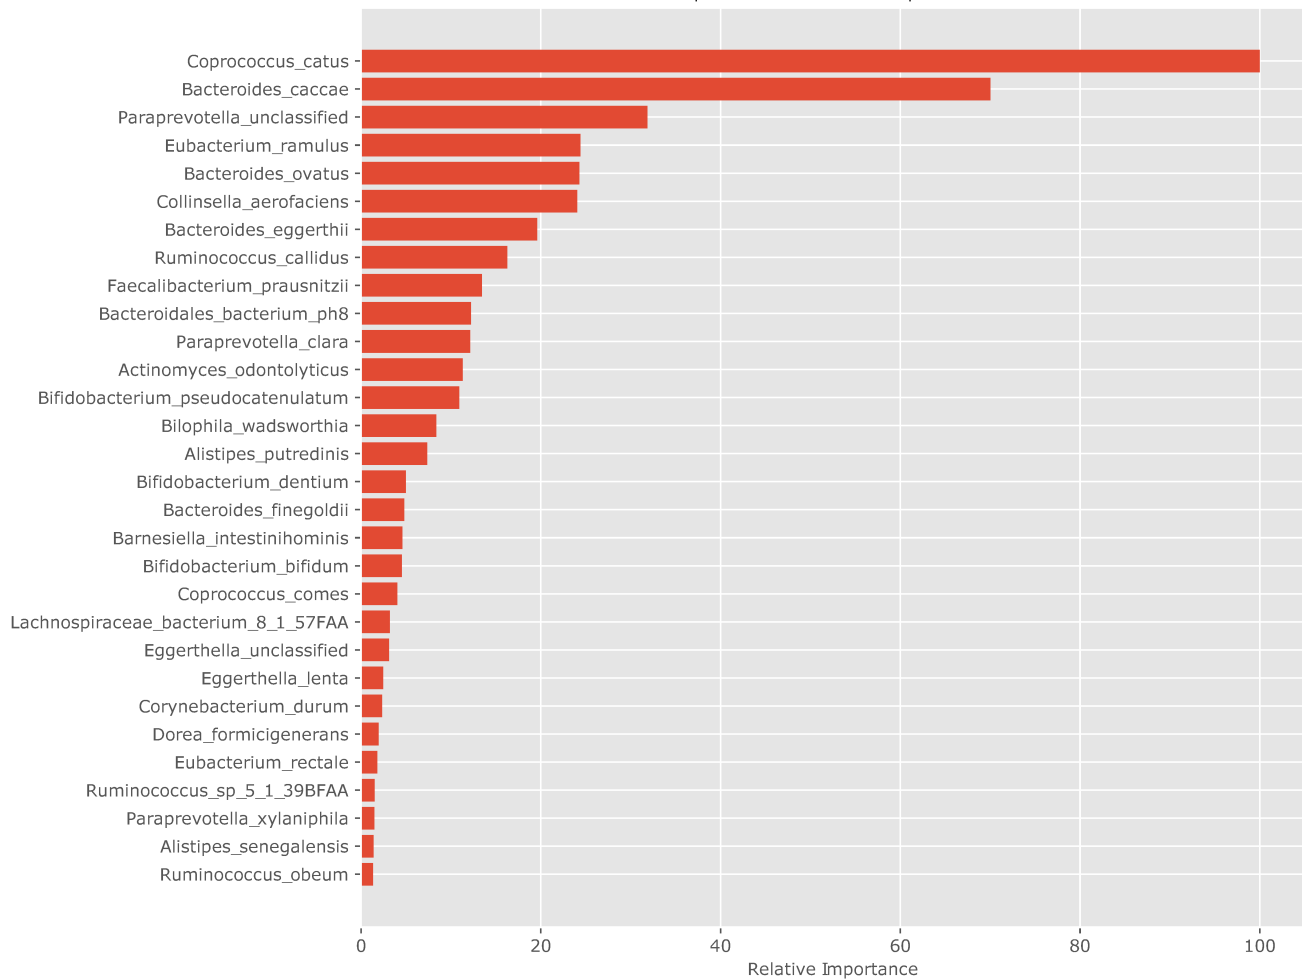

S8

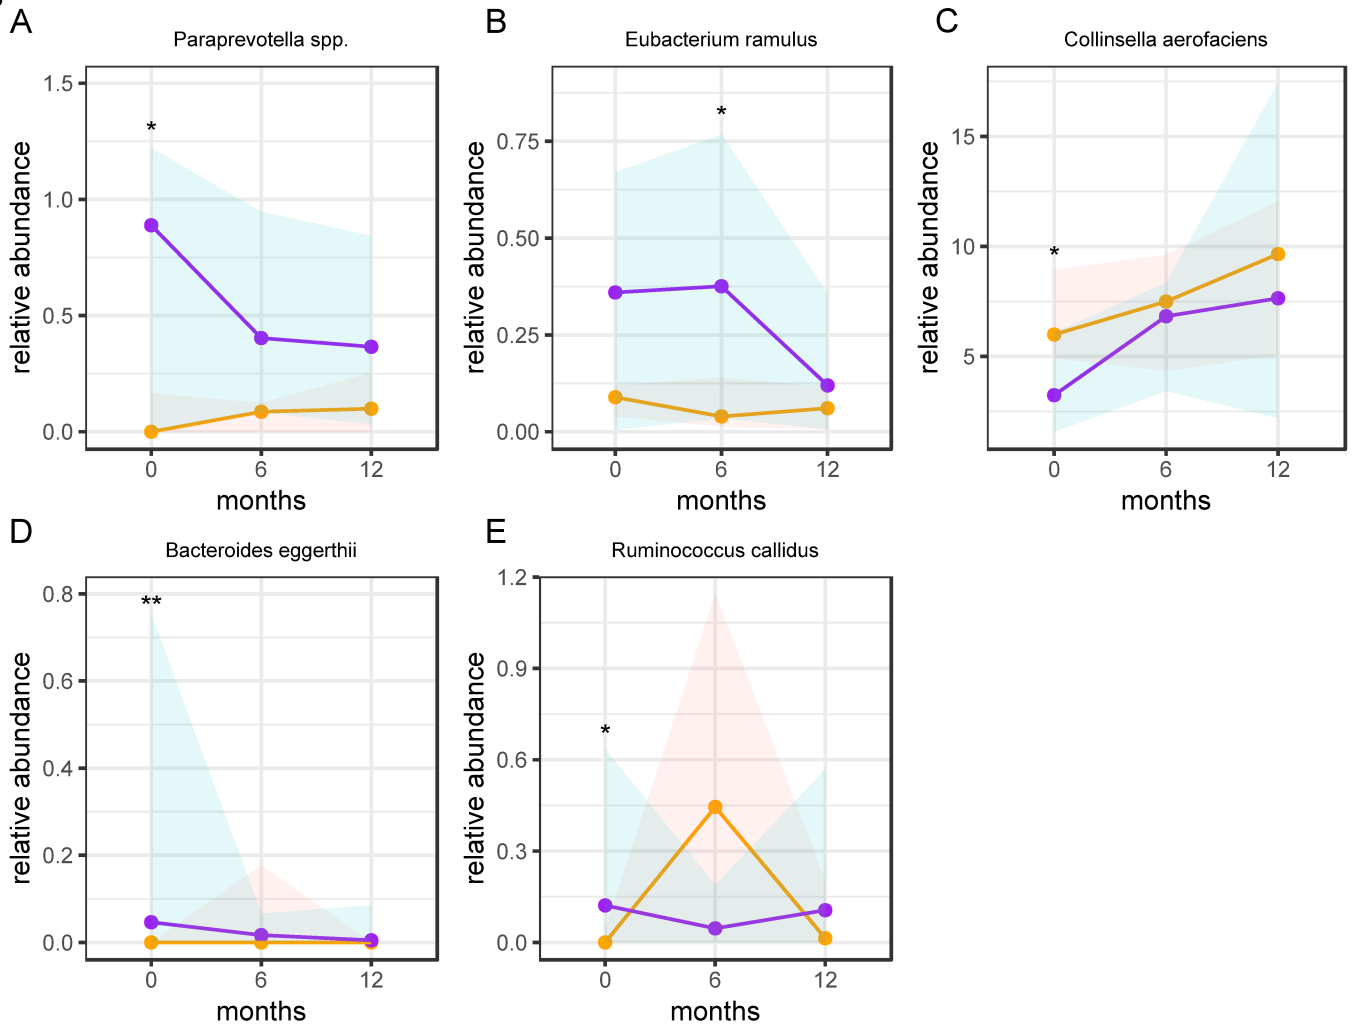



S9

A

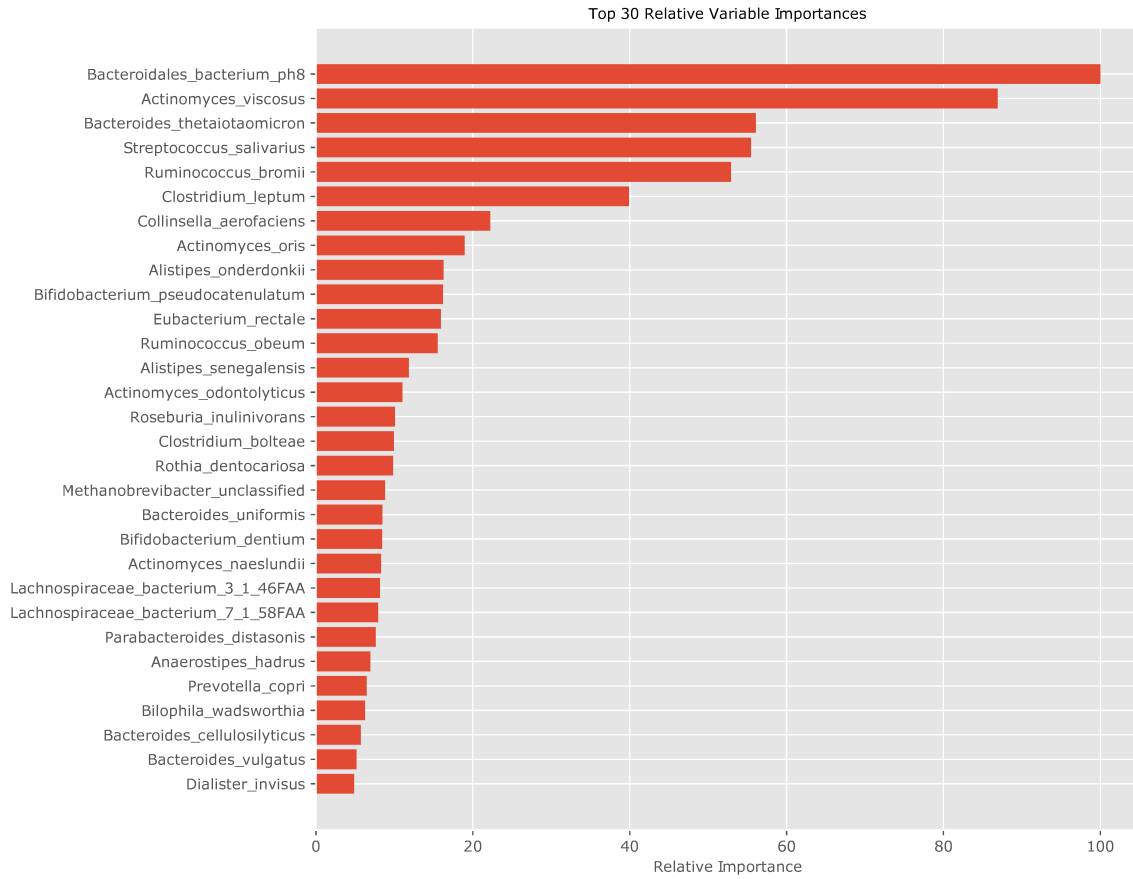

B

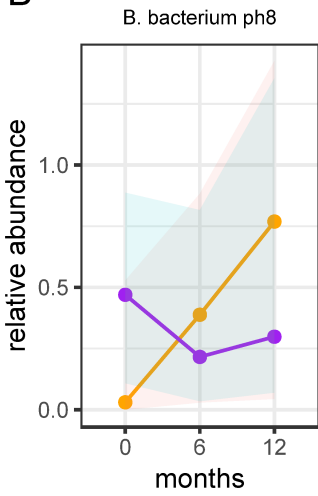

C

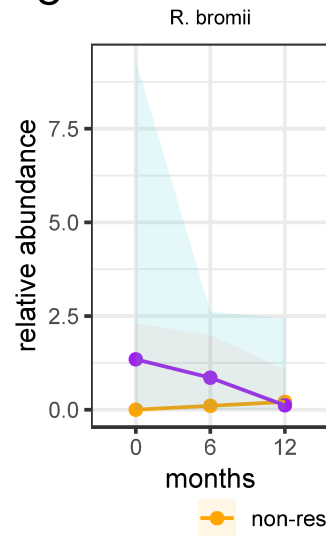

D

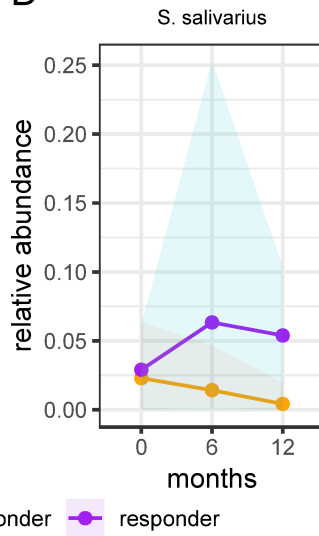

E

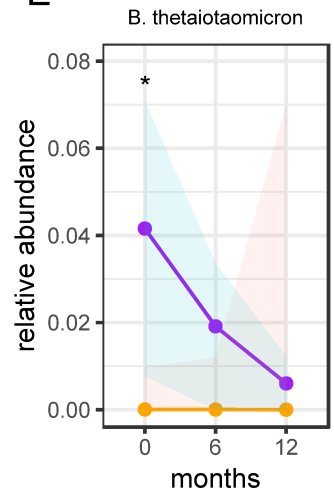

F

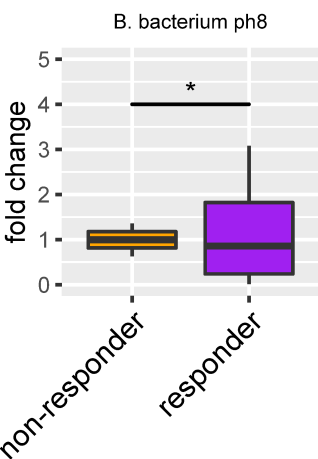

G

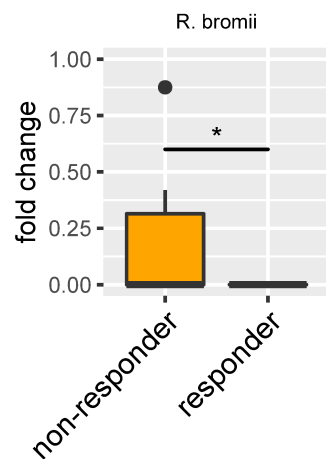

H

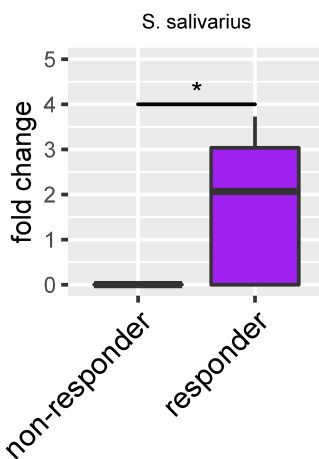

I

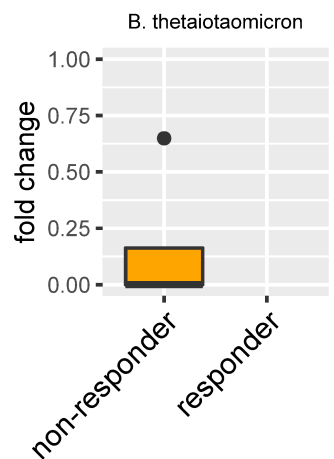

S10

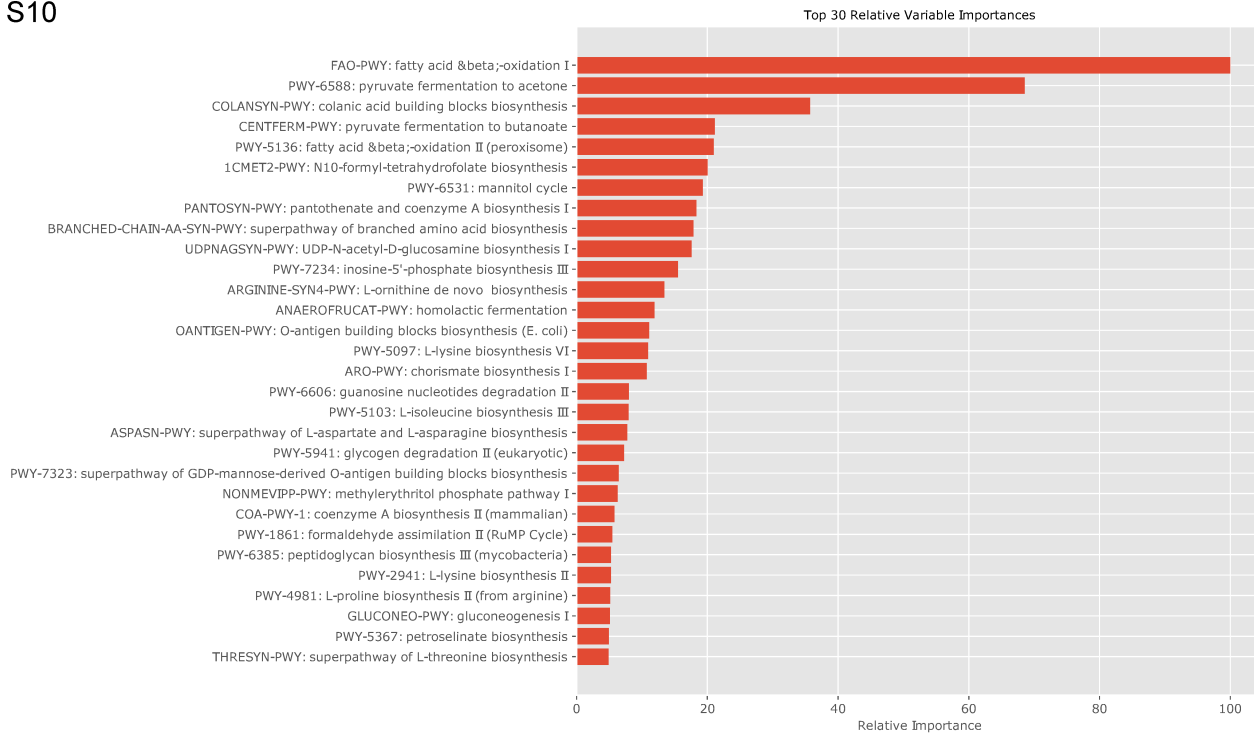

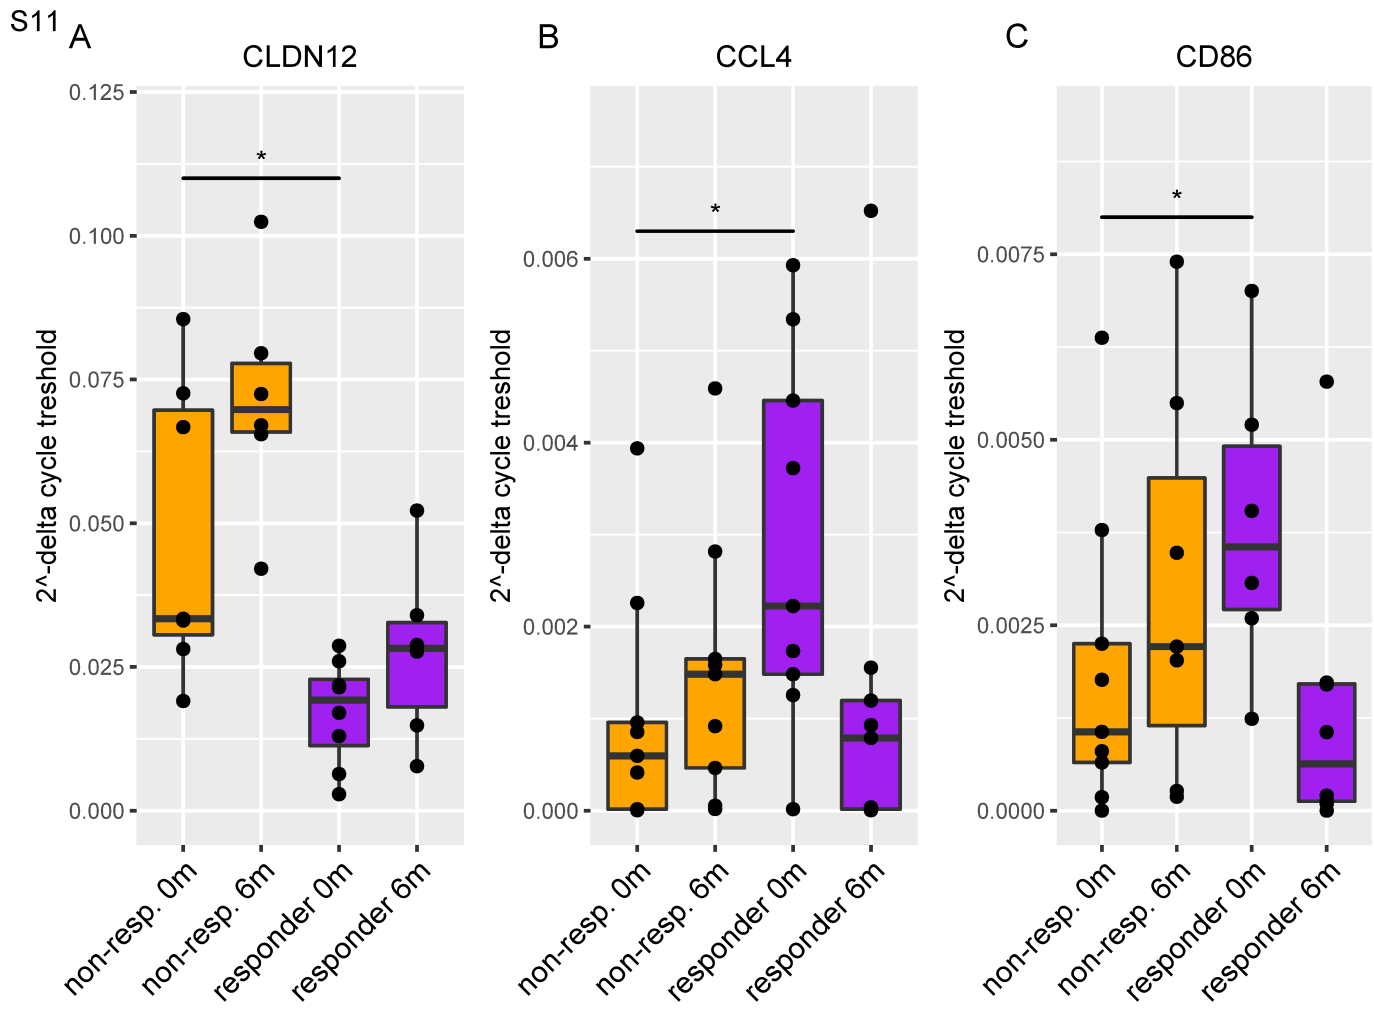

S12

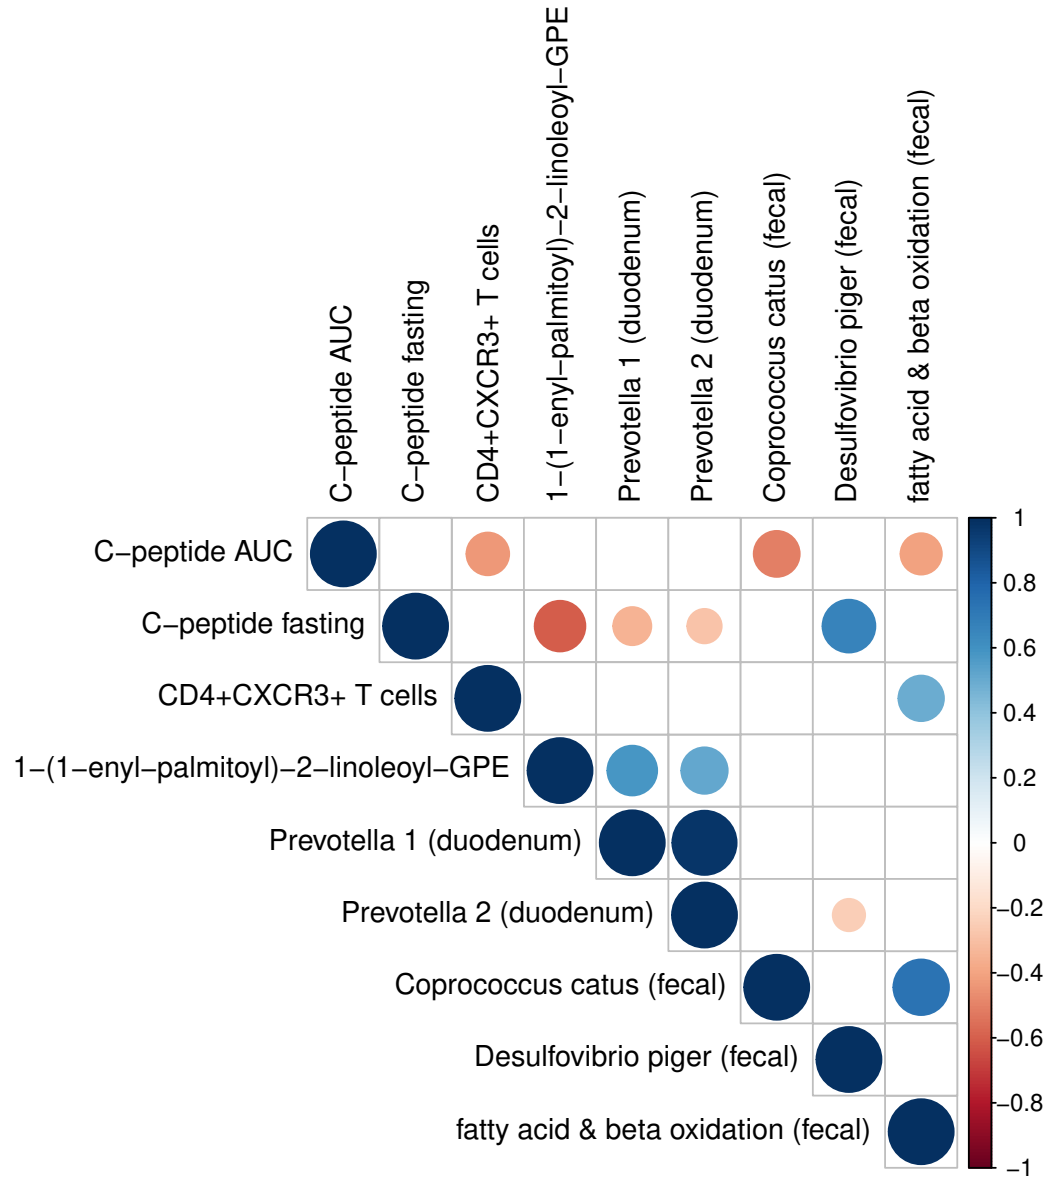

Supplement: inline-supplementary-material-4 [file inline-supplementary-material-4.pdf]
