# Supplementary material
Source: HighWire-hosted journal article supplement (https://gut.bmj.com/content/70/1/92)
Supplement: inline-supplementary-material-2 [file inline-supplementary-material-2.pdf]

Supplementary table 1

| GeneCard Cell Junctions<br>Gene code | Gene name                                  | Gene type    | GeneCard Inflammation<br>Gene code | Gene name                                                              | Gene type    |
|--------------------------------------|--------------------------------------------|--------------|------------------------------------|------------------------------------------------------------------------|--------------|
| GAPDH-H99999905_m1                   | glyceraldehyde-3-phosphate dehydrogenase   | housekeeping | GAPDH-H99999905_m1                 | glyceraldehyde-3-phosphate dehydrogenase                               | housekeeping |
| CAV1-H60071716_m1                    | caveolin 1                                 | target       | ACTB-H99999903_m1                  | actin beta                                                             | housekeeping |
| CAV2-H60084597_m1                    | caveolin 2                                 | target       | ALDO5-H60016756_m1                 | araldichonate 5-lipasegenase                                           | target       |
| CAV3-H600154292_m1                   | caveolin 3                                 | target       | B2M-H99999907_m1                   | beta-2-microglobulin                                                   | housekeeping |
| CDH1-H601023894_m1                   | cadherin 1                                 | target       | HSPA5-H600607129_gH                | heat shock protein family A (Hsp70) member 5                           | target       |
| CDH2-H600898056_m1                   | cadherin 2                                 | target       | CARD9-H600364485_m1                | caspase recruitment domain family member 9                             | target       |
| CDN1-H600215623_m1                   | claudin 1                                  | target       | ACKR2-H600174299_m1                | atypical chemokine receptor 2                                          | target       |
| CDN10-H600734479_m1                  | claudin 10                                 | target       | CC11-H600337013_m1                 | C-C motif chemokine ligand 11                                          | target       |
| CDN11-H600194440_m1                  | claudin 11                                 | target       | CC13-H600234646_m1                 | C-C motif chemokine ligand 13                                          | target       |
| CDN12-H60073258_s1                   | claudin 12                                 | target       | CC15-CC14-CC115-H600263142_m1      | CC15-CC14, C-C motif chemokine ligand 15                               | target       |
| CDN14-H600273267_s1                  | claudin 14                                 | target       | CC16-H600171123_m1                 | C-C motif chemokine ligand 16                                          | target       |
| CDN15-H600204982_m1                  | claudin 15                                 | target       | CC17-H600170774_m1                 | C-C motif chemokine ligand 17                                          | target       |
| CDN16-H601070692_m1                  | claudin 16                                 | target       | CC18-H600268113_m1                 | C-C motif chemokine ligand 18                                          | target       |
| CDN17-H601043467_s1                  | claudin 17                                 | target       | CC19-H600171149_m1                 | C-C motif chemokine ligand 19                                          | target       |
| CDN18-H600212584_m1                  | claudin 18                                 | target       | CC11-H60017072_m1                  | C-C motif chemokine ligand 1                                           | target       |
| CDN19-H600963709_m1                  | claudin 19                                 | target       | CC2-H600234140_m1                  | C-C motif chemokine ligand 2                                           | target       |
| CDN2-H600232666_s1                   | claudin 2                                  | target       | CC20-H600171125_m1                 | C-C motif chemokine ligand 20                                          | target       |
| CDN3-H600265816_s1                   | claudin 3                                  | target       | CC21-H600171076_m1                 | C-C motif chemokine ligand 21                                          | target       |
| CDN4-H600978683_s1                   | claudin 4                                  | target       | CC22-H600171080_m1                 | C-C motif chemokine ligand 22                                          | target       |
| CDN5-H600253940_s1                   | claudin 5                                  | target       | CC25-H600171144_m1                 | C-C motif chemokine ligand 25                                          | target       |
| CDN6-H600607528_s1                   | claudin 6                                  | target       | CC26-H600171146_m1                 | C-C motif chemokine ligand 26                                          | target       |
| CDN7-H600600772_m1                   | claudin 7                                  | target       | UBC-H600824723_m1                  | ubiquitin C                                                            | housekeeping |
| CDN8-H600186769_s1                   | claudin 8                                  | target       | CC13-H600234142_m1                 | C-C motif chemokine ligand 3                                           | target       |
| CDN9-H600251134_s1                   | claudin 9                                  | target       | CC4-H600174575_m1                  | C-C motif chemokine ligand 4                                           | target       |
| DLL1-H600194509_m1                   | delta like canonical Notch ligand 1        | target       | CC5-H600174575_m1                  | C-C motif chemokine ligand 5                                           | target       |
| DSC1-H600245189_m1                   | desmocollin 1                              | target       | CC7-H600171147_m1                  | C-C motif chemokine ligand 7                                           | target       |
| DSC2-H600951428_m1                   | desmocollin 2                              | target       | CC8-H600271616_m1                  | C-C motif chemokine ligand 8                                           | target       |
| DSC3-H600170032_m1                   | desmocollin 3                              | target       | CCR1-H600174296_m1                 | C-C motif chemokine receptor 1                                         | target       |
| DSC4-H600355084_m1                   | desmocollin 4                              | target       | CCR3-H600356601_m1                 | C-C motif chemokine receptor 3                                         | target       |
| DSC5-H600170071_m1                   | desmocollin 5                              | target       | CCR3-H600266213_s1                 | C-C motif chemokine receptor 3                                         | target       |
| DSC6-H600951897_m1                   | desmocollin 6                              | target       | CCR4-H99999919_m1                  | C-C motif chemokine receptor 4                                         | target       |
| DSC7-H60096206_m1                    | desmocollin 7                              | target       | CCR5-H60052937_m1                  | C-C motif chemokine receptor 5                                         | target       |
| DSP-H600950501_m1                    | desmoglein                                 | target       | CCR6-H600171121_m1                 | C-C motif chemokine receptor 6                                         | target       |
| DST-H600156137_m1                    | dystonin                                   | target       | CCR7-H600171054_m1                 | C-C motif chemokine receptor 7                                         | target       |
| ESAM-H600332781_m1                   | endothelial cell adhesion molecule         | target       | CCR8-H600174764_m1                 | C-C motif chemokine receptor 8                                         | target       |
| F11R-H600170991_m1                   | Fc11 receptor                              | target       | CD14-H602621496_s1                 | CD14 molecule                                                          | target       |
| GJA1-H600748445_s1                   | gap junction protein alpha 1               | target       | CD38-H600174580_m1                 | CD38 molecule                                                          | target       |
| GJA3-H600254296_s1                   | gap junction protein alpha 3               | target       | CD68-H600154355_m1                 | CD68 molecule                                                          | target       |
| GJA4-H600704917_s1                   | gap junction protein alpha 4               | target       | CD80-H601045161_m1                 | CD80 molecule                                                          | target       |
| GJA5-H600270952_s1                   | gap junction protein alpha 5               | target       | CD86-H601570706_m1                 | CD86 molecule                                                          | target       |
| GJA8-H600170980_m1                   | gap junction protein alpha 8               | target       | CD8A-H600339937_m1                 | chromogranin A                                                         | target       |
| GJB1-H600939759_s1                   | gap junction protein beta 1                | target       | DDIT3-H600358796_g1                | DNA damage inducible transcript 3                                      | target       |
| GJB2-H600269615_s1                   | gap junction protein beta 2                | target       | PTGS2-H600153133_m1                | prostaglandin-endoperoxide synthase 2                                  | target       |
| GJB3-H600278125_s1                   | gap junction protein beta 3                | target       | CSF1-H600174164_m1                 | colony stimulating factor 1                                            | target       |
| GJB4-H600202816_s1                   | gap junction protein beta 4                | target       | CTLA4-H600174500_m1                | cytotoxic T-lymphocyte associated protein 4                            | target       |
| GJB5-H601921450_s1                   | gap junction protein beta 5                | target       | CX3C1-H600171086_m1                | C-X3-C motif chemokine ligand 1                                        | target       |
| GJB6-H600922742_s1                   | gap junction protein beta 6                | target       | CX3CR1-H600365842_m1               | C-X3-C motif chemokine receptor 1                                      | target       |
| GJC2-H600257113_s1                   | gap junction protein gamma 2               | target       | CXCL10-H600171042_m1               | C-X-C motif chemokine ligand 10                                        | target       |
| GJDB2-H600950432_m1                  | gap junction protein delta 2               | target       | CXCL12-H600171022_m1               | C-X-C motif chemokine ligand 12                                        | target       |
| GUC3-H601384570_m1                   | gap junction protein gamma 3               | target       | CXCL1-H600236937_m1                | C-X-C motif chemokine ligand 1                                         | target       |
| I CAM1-H600164932_m1                 | intercellular adhesion molecule 1          | target       | CXCL3-H600171065_m1                | C-X-C motif chemokine ligand 9                                         | target       |
| I CAM2-H600609563_m1                 | intercellular adhesion molecule 2          | target       | CXCR1-H600174146_m1                | C-X-C motif chemokine receptor 1                                       | target       |
| ITGA1-H600235006_m1                  | integrin subunit alpha 1                   | target       | CXCR2-H600174304_m1                | C-X-C motif chemokine receptor 2                                       | target       |
| ITGA2-H600158127_m1                  | integrin subunit alpha 2                   | target       | CXCR3-H600171041_m1                | C-X-C motif chemokine receptor 3                                       | target       |
| ITGA3-H601076873_m1                  | integrin subunit alpha 3                   | target       | CXCR4-H600237052_m1                | C-X-C motif chemokine receptor 4                                       | target       |
| ITGA4-H600168433_m1                  | integrin subunit alpha 4                   | target       | CXCR6-H600174843_m1                | C-X-C motif chemokine receptor 6                                       | target       |
| ITGA5-H601547673_m1                  | integrin subunit alpha 5                   | target       | ACKR3-H600604567_m1                | atypical chemokine receptor 3                                          | target       |
| ITGA6-H601041011_m1                  | integrin subunit alpha 6                   | target       | FCFR3B/CCR3B-H600275547_m1         | Fc fragment of IgG receptor 3 beta 3 fragment of IgG receptor 3 beta 3 | target       |
| ITGA7-H600174397_m1                  | integrin subunit alpha 7                   | target       | GAD2-H600609534_m1                 | glutamate decarboxylase 2                                              | target       |
| ITGA8-H600233321_m1                  | integrin subunit alpha 8                   | target       | HCK-H601067403_m1                  | HCK proto-oncogene, Src family tyrosine kinase                         | target       |
| ITGA9-H600979865_m1                  | integrin subunit alpha 9                   | target       | PTPRN-H601090891_g1                | protein tyrosine phosphatase, receptor type N                          | target       |
| ITGAL-H600158218_m1                  | integrin subunit alpha L                   | target       | IDO1-H600941488_m1                 | indoleamine 2,3-dioxygenase 1                                          | target       |
| ITGAM-H600355885_m1                  | integrin subunit alpha M                   | target       | IFNG-H600174143_m1                 | interferon gamma                                                       | target       |
| ITGAV-H600233808_m1                  | integrin subunit alpha V                   | target       | IL10-H600174086_m1                 | interleukin 10                                                         | target       |
| ITGB1-H600559595_m1                  | integrin subunit beta 1                    | target       | IL12A-H600168405_m1                | interleukin 12A                                                        | target       |
| ITGB2-H601616957_m1                  | integrin subunit beta 2                    | target       | RPLP0-H99999902_m1                 | ribosomal protein lateral stalk subunit P0                             | housekeeping |
| ITGB3-H600014649_m1                  | integrin subunit beta 3                    | target       | IL12B-H600233688_m1                | interleukin 12B                                                        | target       |
| ITGB4-H600236216_m1                  | integrin subunit beta 4                    | target       | IL15-H600542562_m1                 | interleukin 15                                                         | target       |
| ITGB5-H600174435_m1                  | integrin subunit beta 5                    | target       | IL15RA-H600542602_g1               | interleukin 15 receptor subunit alpha                                  | target       |
| ITGB6-H600161658_m1                  | integrin subunit beta 6                    | target       | IL17A-H600174383_m1                | interleukin 17A                                                        | target       |
| JAM2-H601022026_m1                   | junctional adhesion molecule 2             | target       | IL18A-H600950101_m1                | interleukin 1 receptor type 1                                          | target       |
| JAM3-H600230289_m1                   | junctional adhesion molecule 3             | target       | IL18-H600174097_m1                 | interleukin 1 beta                                                     | target       |
| JUP-H600158408_m1                    | junction plakoglobin                       | target       | IL2-H600174114_m1                  | interleukin 2                                                          | target       |
| NOTCH1-H601062014_m1                 | notch 1                                    | target       | IL22-H601574154_m1                 | interleukin 22                                                         | target       |
| NOTCH2-H601050702_m1                 | notch 2                                    | target       | IL4-H600174122_m1                  | interleukin 4                                                          | target       |
| NOTCH3-H601128541_m1                 | notch 3                                    | target       | IL4R-H600166237_m1                 | interleukin 4 receptor                                                 | target       |
| NOTCH4-H600965889_m1                 | notch 4                                    | target       | IL6-H600174131_m1                  | interleukin 6                                                          | target       |
| OCLN-H600170162_m1                   | occludin                                   | target       | CXCL8-H600174103_m1                | C-X-C motif chemokine ligand 8                                         | target       |
| PLECH-H600356986_g1                  | plectin                                    | target       | INS-H602741308_m1                  | insulin                                                                | target       |
| NECTIN1-H601591978_m1                | nectin cell adhesion molecule 1            | target       | IAG3-H600958444_g1                 | lymphocyte activating 3                                                | target       |
| NECTIN2-H601071562_m1                | nectin cell adhesion molecule 2            | target       | LST1-H600705788_s1                 | leukocyte specific transcript 1                                        | target       |
| NECTIN3-H600210043_m1                | nectin cell adhesion molecule 3            | target       | CIITA-H600172106_m1                | class II, major histocompatibility complex, transactivator             | target       |
| TJP1-H601518161_m1                   | tight junction protein 1                   | target       | MF1-H600235988_g1                  | macrophage migration inhibitory factor                                 | target       |
| TJP2-H600910543_m1                   | tight junction protein 2                   | target       | NOD2-H600223394_m1                 | nucleotide binding oligomerization domain containing 2                 | target       |
| TJP3-H600274276_m1                   | tight junction protein 3                   | target       | NOS2-H600167257_m1                 | nitric oxide synthase 2                                                | target       |
| HPRT1-H99999909_m1                   | hypoxanthine phosphoribosyltransferase 1   | housekeeping | PCDD1-H601550088_m1                | programmed cell death 1                                                | target       |
| GUSB-H99999908_m1                    | glucuronidase beta                         | housekeeping | CD274-H600202457_m1                | CD274 molecule                                                         | target       |
| ACTB-H99999903_m1                    | actin beta                                 | housekeeping | PTX3-H600173615_m1                 | pectin 3                                                               | target       |
| B2M-H99999907_m1                     | beta-2-microglobulin                       | housekeeping | SIGIRR-H600223247_m1               | single Ig and TIR domain containing                                    | target       |
| HMB5-H600609297_m1                   | hydroxymethylbilane synthase               | housekeeping | TMEM173-H600736955_g1              | transmembrane protein 173                                              | target       |
| PCB8-H600183533_m1                   | impartin 8                                 | housekeeping | SYP-H600306531_m1                  | synaptoophysin                                                         | target       |
| PGC1A-H99999906_m1                   | phosphoglycerate kinase 1                  | housekeeping | TNF-H600174122_m1                  | tumor necrosis factor                                                  | target       |
| RPLP0-H99999902_m1                   | ribosomal protein lateral stalk subunit P0 | housekeeping | TSpan7-H600190284_m1               | tetraspanin 7                                                          | target       |
| TBP-H99999910_m1                     | TATA-box binding protein                   | housekeeping | VEGFA-H600900054_m1                | vascular endothelial growth factor A                                   | target       |
| TRPC-H99999911_m1                    | transient receptor                         | housekeeping | CDorf54-H600735289_m1              | chromosome 10 open reading frame 54                                    | target       |
| UBC-H600824723_m1                    | ubiquitin C                                | housekeeping | KCNJ8-H600958961_m1                | potassium voltage-gated channel subfamily 1 member 8                   | target       |
